# Supplementary material for: Alpha-satellite RNA transcripts are repressed by centromere–nucleolus associations
Source: eLife journal article supplement (doi:10.7554/elife.59770), 2020-11-10
Supplement: supp [file elife-59770-supp-v1.zip]

Archive with 11 entries (11 files):
- elife_poa_e59770_Figure_1_figure_supplement_1.pdf
- elife_poa_e59770_Figure_3_figure_supplement_1.pdf
- elife_poa_e59770_Figure_4_figure_supplement_1.pdf
- elife_poa_e59770_Figure_5_figure_supplement_1.pdf
- elife_poa_e59770_Supplementary_file_1.xlsx
- elife_poa_e59770_Supplementary_file_2.xlsx
- elife_poa_e59770_Transparent_Reporting_File.docx
- elife_poa_e59770_Figure_1_source_data_1.xlsx
- elife_poa_e59770_Figure_3_source_data_1.xlsx
- elife_poa_e59770_Figure_4_source_data_1.xlsx
- elife_poa_e59770_Figure_5_figure_supplement_1_source_data_1.xlsx
