# Supplementary material for: Alpha-satellite RNA transcripts are repressed by centromere–nucleolus associations
Source: eLife journal article supplement (doi:10.7554/elife.59770), 2020-11-10
Supplement: supp [file elife-59770-supp-v1.zip › elife_poa_e59770_Figure_1_source_data_1.xlsx]

## Sheet: Sheet1
			Ct
			GAPDH	CH21
		1:10 std	13.3505	17.7688
		1:50 std	15.4865	19.922
		1:250 std	17.4478	22.0308								Figure 1F
		1:1000 std	19.6235	24.1318
		NoRT	N/A	30.2932				Interpolated CH21/GAPDH	Fold change over HeLa		HeLa	100
		HeLa	13.8392	20.7068			HeLa	4.00756	1		Rpe1	0 (not detected)
		Rpe1	14.2025	28.8678			Rpe1	0	0
								No standard curve				Figure 1 -figure supplement 1 D
							HeLa	0.00856348	1			Average	Standard Deviation
			Ct				Rpe1	3.84853e-05	0.00449412		HeLa	100	0
			GAPDH	CH21							Rpe1	3.35239	5.28198
		1:10 std	14.84	18.6107
		1:50 std	16.9407	20.7
		1:250 std	19.3587	23.0177				Interpolated CH21/GAPDH	Fold change over HeLa
		HeLa	18.19	22.6857			HeLa	0.6463	1
		Rpe1	17.8743	31.6707			Rpe1	0	0
								No standard curve
							HeLa	0.0443271	1
			Ct				Rpe1	7.02894e-05	0.0015857
			GAPDH	CH21
		1:10 std	13.736	19.9823
		1:50 std	16.0637	22.1587
		1:250 std	18.416	24.518
		1:1000 std	20.57	26.676				Interpolated CH21/GAPDH	Fold change over HeLa
		HeLa	13.472	22.001			HeLa	0.183767	1
		Rpe1	16.6227	28.5553			Rpe1	0	0
								No standard curve
							HeLa	0.00270717	1
							Rpe1	0.000255805	0.0944918
