# Supplementary material for: Alpha-satellite RNA transcripts are repressed by centromere–nucleolus associations
Source: eLife journal article supplement (doi:10.7554/elife.59770), 2020-11-10
Supplement: supp [file elife-59770-supp-v1.zip › elife_poa_e59770_Figure_3_source_data_1.xlsx]

## Sheet: Sheet1
			Ct
			GAPDH	CH21
		1:10 std	13.3505	17.7688
		1:50 std	15.4865	19.922
		1:250 std	17.4478	22.0308
		1:1000 std	19.6235	24.1318
		NoRT	N/A	30.2932			Interpolated CH21/GAPDH	Fold change over HeLa
		HeLa	13.8392	20.7068		HeLa	4.00756	1			Figure 3D
		Pol I Inh	14.4597	18.2898		RNA pol I	36.5591	9.12254			Average	Standard Deviation
		CDK7 Inh	15.7648	24.9708		RNA pol II	0	0		HeLa	100	1.40794e-06
										CDK7 Inh	0.626244	1.08469
			Ct							Pol I Inh	2384.07	1410.89
			GAPDH	CH21
		1:10 std	14.84	18.6107
		1:50 std	16.9407	20.7
		1:250 std	19.3587	23.0177			Interpolated CH21/GAPDH	Fold change over HeLa
		HeLa	18.19	22.6857		HeLa	0.6463	1
		CDK7 Inh	15.5317	24.355		RNA pol II	0.0121422	0.0187873
			Ct
			GAPDH	CH21
		1:10 std	13.736	19.9823
		1:50 std	16.0637	22.1587
		1:250 std	18.416	24.518
		1:1000 std	20.57	26.676			Interpolated CH21/GAPDH	Fold change over HeLa
		HeLa	13.472	22.001		HeLa	0.183767	1
		Pol I Inh	16.855	20.7443		RNA pol I	4.62189	25.1508
			Ct
			GAPDH	CH21
		1:10 std	13.5792	19.6596
		1:50 std	15.9155	21.7906
		1:250 std	18.1712	23.9291
		1:1000 std	20.3123	26.2646
		NoRT	N/A	30.403			Interpolated CH21/GAPDH	Fold change over HeLa
		HeLa	13.8438	22.5992		HeLa	0.161546	1
		Pol I Inh	14.0681	17.7938		RNA pol I	6.0174	37.2489
		CDK7 Inh	13.9877	26.5284		RNA pol II	0	0
