# Supplementary material for: Alpha-satellite RNA transcripts are repressed by centromere–nucleolus associations
Source: eLife journal article supplement (doi:10.7554/elife.59770), 2020-11-10
Supplement: supp [file elife-59770-supp-v1.zip › elife_poa_e59770_Figure_4_source_data_1.xlsx]

## Sheet: Sheet1
			Ct
			GAPDH	CH21
		1:10 std	13.3505	17.7688
		1:50 std	15.4865	19.922
		1:250 std	17.4478	22.0308								Figure 4D
		1:1000 std	19.6235	24.1318
		NoRT	N/A	30.2932			Interpolated CH21/GAPDH	Fold change over HeLa				Average	Standard Deviation
		HeLa	13.8392	20.7068		HeLa	4.00756	1			Control	1.14484	0.289805
		CTT20	13.952	20.3797		CTT20	5.57618	1.39142			CenpC iKO	9.39287	4.46537
		CenpC iKO	14.1977	17.4674		CenpC iKO	53.9468	13.4613
		CenpC iKO	13.9261	17.2351		CenpC iKO	52.2356	13.0343
			Ct
			GAPDH	CH21
		1:10 std	14.84	18.6107
		1:50 std	16.9407	20.7
		1:250 std	19.3587	23.0177			Interpolated CH21/GAPDH	Fold change over HeLa
		HeLa	18.19	22.6857		HeLa	0.6463	1
		CenpC iKO	17.6397	19.953		CenpC iKO	3.3346	5.15952
		CenpC iKO	18.1317	20.3187		CenpC iKO	3.82378	5.91641
			Ct
			GAPDH	CH21			2^-ct	Fold change over HeLa
		HeLa	18.4683	23.7398		HeLa	0.40006	1
		CTT20	16.341	21.962		CTT20	0.3303	0.825627
			Ct
			GAPDH	CH21
		1:10 std	13.736	19.9823
		1:50 std	16.0637	22.1587
		1:250 std	18.416	24.518
		1:1000 std	20.57	26.676			Interpolated CH21/GAPDH	Fold change over HeLa
		HeLa	13.472	22.001		HeLa	0.183767	1
		CTT20	13.6	21.8493		CTT20	0.223732	1.21748
			Ct
	Sample	Treatment	GAPDH	CH21
	Standard	1:50 std	16.848	23.8941
	Standard	1:250 std	19.2405	26.2931						Figure 4H
	Standard	1:1250 std	21.793	28.7617
	Standard	1:6000 std	25.0762	31.8327
	No RT	No RT	39.772	31.5467		Interpolated CH21/GAPDH	Fold change relative to 0minute
	HeLa	0 min THZ1	16.3689	24.4057		0.535129	1			Time after THZ1	Average fold change	Standard Deviation
	HeLa	30min THZ1	16.6409	24.6756		0.536311	1.00221		HeLa	0	1	0
	HeLa	1hr THZ1	15.9885	25.2337		0.233423	0.436199		HeLa	30	1.31846	0.447242
	HeLa	2hr THZ1	15.8338	25.3791		0.189982	0.355021		HeLa	60	0.665323	0.324031
	HeLa	5hr THZ1	16.6477	27.8039		0.0666828	0.124611		HeLa	120	0.658457	0.429123
	HeLa	0 min THZ1	16.0555	23.8586		0.628063	1		HeLa	300	0.161031	0.0515062
	HeLa	30min THZ1	17.7211	24.8107		1.0267	1.6347
	HeLa	1hr THZ1	16.6753	24.6426		0.56177	0.894448
	HeLa	2hr THZ1	16.9517	24.8141		0.60413	0.961893
	HeLa	5hr THZ1	17.867	28.1496		0.124012	0.197451
	Standard	1:50 std	18.3314	22.9517
	Standard	1:250 std	20.6848	25.3466
	Standard	1:1250 std	23.3494	27.6779
	Standard	1:6000 std	26.0557	30.8376
	No RT	No RT	N/A	35.5506						Time after THZ1	Average fold change	Standard Deviation
	CenpC iKO	0 min THZ1	19.5642	22.9961		2.26282	1		CenpC iKO	0	1	0
	CenpC iKO	30min THZ1	19.4342	23.9368		1.08405	0.479069		CenpC iKO	30	1.50849	1.45583
	CenpC iKO	1hr THZ1	19.749	23.9002		1.37826	0.609088		CenpC iKO	60	1.04989	0.62339
	CenpC iKO	2hr THZ1	19.1846	24.4996		0.621653	0.274725		CenpC iKO	120	0.620526	0.489037
	CenpC iKO	5hr THZ1	19.7857	26.5158		0.24264	0.107229		CenpC iKO	300	0.169656	0.0882847
	CenpC iKO	0 min THZ1	19.0268	23.9297		0.823962	1
	CenpC iKO	30min THZ1	19.8237	23.3678		2.09115	2.53792
	CenpC iKO	1hr THZ1	18.7887	23.1112		1.22828	1.49069
	CenpC iKO	2hr THZ1	19.1201	24.073		0.796217	0.966327
	CenpC iKO	5hr THZ1	19.1267	26.1917		0.191227	0.232082
