# Supplementary material for: Alpha-satellite RNA transcripts are repressed by centromere–nucleolus associations
Source: eLife journal article supplement (doi:10.7554/elife.59770), 2020-11-10
Supplement: supp [file elife-59770-supp-v1.zip › elife_poa_e59770_Figure_5_figure_supplement_1_source_data_1.xlsx]

## Sheet: Sheet1
			Ct
			GAPDH	CH21
		1:10 std	13.3505	17.7688
		1:50 std	15.4865	19.922
		1:250 std	17.4478	22.0308
		1:1000 std	19.6235	24.1318							Figure 5 - figure supplement 1E
		NoRT	N/A	30.2932			Interpolated CH21/GAPDH	Fold change over HeLa
		HeLa	13.8392	20.7068		HeLa	4.00756	1			Average	Standard Deviation
		Ki67	14.1607	20.6254		Ki67	5.37243	1.34057		HeLa	1	0
										Ki67	1.03167	0.26915
			Ct
			GAPDH	CH21
		1:10 std	14.84	18.6107
		1:50 std	16.9407	20.7
		1:250 std	19.3587	23.0177			Interpolated CH21/GAPDH	Fold change over HeLa
		HeLa	18.19	22.6857		HeLa	0.6463	1
		Ki67	16.8453	21.5833		Ki67	0.547813	0.847613
			Ct
			GAPDH	CH21
		1:10 std	13.736	19.9823
		1:50 std	16.0637	22.1587
		1:250 std	18.416	24.518
		1:1000 std	20.57	26.676			Interpolated CH21/GAPDH	Fold change over HeLa
		HeLa	13.472	22.001		HeLa	0.183767	1
		Ki67	13.1753	21.85		Ki67	0.166646	0.906834
