# Supplementary material for: Alpha-satellite RNA transcripts are repressed by centromere–nucleolus associations
Source: eLife journal article supplement (doi:10.7554/elife.59770), 2020-11-10
Supplement: supp [file elife-59770-supp-v1.zip › elife_poa_e59770_Supplementary_file_1.xlsx]

## Sheet: Sheet1
ASAT Oligos:		ASAT Antisense Oligos:		SF1 Oligos:		SF3 Oligos:		X Oligos:		7.2 Oligos:
CAAAGAAGTTTCTGAGAATG		CATATAAAAACTAGACAGAA		TCTTTGTGGCCTTCGTTGGA		CAGCTGAAATTATCCCGTTT		TTGAATGCAGTCATCGCAGA		AGACTCTGCAAGTGGATATT
TGAGTTGAATGCACACATCA		GTTGGAAACGGGAATATCTT		TCCAACGAAGGCCACAAAGA		AGTTCAACTCGGGGATTTGA		TCTGCGATGACTGCATTCAA		AATATCCACTTGCAGAGTCT
AAAAGGAAGGTTCAACTCTG		TGGACCGCTTTGAGGCCTTC		GTTTCAAATCTGCTCTGTCT		GGTCCAAATATCCACTTGTA		AACTGCTCCATCAGAAGGAT		GCGCTTTGAAGCCTTCGTTG
TGTTTCAAAACTGCTCTATG		AGAATCTGCAAGTGGATATT		AGACAGAGCAGATTTGAAAC		GATATACCCGTTTCGAACGA		ATCCTTCTGATGGAGCAGTT		CAACGAAGGCTTCAAAGCGC
TGCAGATTCTACAAAAAGAG		TTTTGAAACACTCTTTTTGT		TTGTGGAATTTGCAAGTGGA		TTCTGTCTAGATGGCATGTG		TCCGAGAATGCTTCTGTTTA		ACTTCTTTGTGATGTGGGCA
AAGCGGTCCAAATATCCACT		CCTTCCTTTTCATAGAGCAG		TCCACTTGCAAATTCCACAA		TGCAGTCATCACAGAGAAGC		TAAACAGAAGCATTCTCGGA		TGCCCACATCACAAAGAAGT
CGTTTCCAACGAAGGCCTCA		ATTCAACTCACAGAGTTGAA		CTACGAAGGCCTCAAAGAGG		CTGCGCTCTCAAAAGGAGAG		AATCTGCAAGTGGACGTTTG		CTTCAAAGCGCTCCAAATGT
TTTTTATATGAAGATATTCC		AACTTCTTTGTGATGTGTGC		CCTCTTTGAGGCCTTCGTAG		TGAAGATGATTCCGTTTCCA		CAAACGTCCACTTGCAGATT		ACATTTGGAGCGCTTTGAAG
CTGAGAATGCTTCTGTCTAG		TAGACAGAAGCATTCTCAGA		AAATCTCCCCTTGCAAATTC		TTCCTGAGAATGCATCTGTG		GATTCCAATCTGCTCTATCA		GAAGATATTCCCTTTTCCAT
CACACATCACAAAGAAGTTT		GAATATCTTCATATAAAAAC		GAATTTGCAAGGGGAGATTT		AGTTCAACTCTGGGAGTTGA		TGATAGAGCAGATTGGAATC		ATGGAAAAGGGAATATCTTC
TCAACTCTGTGAGTTGAATG		GAGGCCTTCGTTGGAAACGG		GAAATCCCGTTTCCAACGAA		CATAGCTGCTCTTTCCAAAG		TGGATATTTGGAGCTCTCTG		TCTGTCTAGGTTTTAGGTGA
TGCTCTATGAAAAGGAAGGT		GTGGATATTTGGACCGCTTT		TTCGTTGGAAACGGGATTTC		CAAACGTCCACTTGCAGATT		CAGAGAGCTCCAAATATCCA		TCACCTAAAACCTAGACAGA
CAAAAAGAGTGTTTCAAAAC		TCTTTTTGTAGAATCTGCAA		ACCTTCCTTTAGACAGAGCG		TTTTCCACCACAAACCACAA		GTGAACATATACCCGTTTCG		GTCGTTTCTGAGAATGCTTC
ATATCCACTTGCAGATTCTA		ATAGAGCAGTTTTGAAACAC		CGCTCTGTCTAAAGGAAGGT		GCAGTTTCTGAGAATGCTTC		CGAAACGGGTATATGTTCAC		GAAGCATTCTCAGAAACGAC
AAGGCCTCAAAGCGGTCCAA		AGAGTTGAACCTTCCTTTTC		ATTTCCTTTTGTACCATTGG		TGTTCAACTCTGTGAGGTGA		TGTTCAACTCTGGGAGTTGA		ATTTGGAGCGCTTTGAAGAC
AGATATTCCCGTTTCCAACG		GATGTGTGCATTCAACTCAC		CCAATGGTACAAAAGGAAAT		GTTTCCAAACTGCTCTATCA		TCAACTCCCAGAGTTGAACA		GTCTTCAAAGCGCTCCAAAT
TCTGTCTAGTTTTTATATGA		ATTCTCAGAAACTTCTTTGT		AAGTCTTTCCAAACTGCTCT		GCTTCTGTCTAGTTTTTCTA		AGCAGTTTCCAAACACACGT		TCAACTCACAGCGTTGAAAC
				AGAGCAGTTTGGAAAGACTT		GGTCCAAATATCCACTTGTA		ACGTGTGTTTGGAAACTGCT		GTTTCAACGCTGTGAGTTGA
				GTGTGCAAGTGGATATTTGG		TTATCCCGTTTCCAACGAAA				AGGTCGAAAAGGAAATATCT
				CCAAATATCCACTTGCACAC		TCTGAGAATGCTTCCGTTTA				AGATATTTCCTTTTCGACCT
				GTGCGTTCAACTCACAGAGT		GATATACCCGTTTCGAACGA
				ACTCTGTGAGTTGAACGCAC		TTTCTGAGAAGGCTTCTGTC
				TCACAAACAGAGGGTTTCCA		GGTTCAACTCTGTGAGTTGA
				TGGAAACCCTCTGTTTGTGA		GAGAGTTTCAACACTGCTCT
				TTCCAACGAAGGCCTCAAAG		ATATTCCCGTTTCCAAAGAC
				CTTTGAGGCCTTCGTTGGAA		CTCCAAATGTCCACTTGTAG
				GAGTGTTTCCAATCTACTCT		GTGACCATAATTCGTTTTCC
				AGAGTAGATTGGAAACACTC		GTTTCTGACAATGCTTCTCT
				TGCAATGTGTGCGTTCAACT		GGAACCTTCAACTCTGTGAG
				AGTTGAACGCACACATTGCA		AATATCCACTTGCAGATTCC
				TGCTAGACAGAAGACTTCTC		GTTTAGCTTTCCTGTGAAGA
				GAGAAGTCTTCTGTCTAGCA		GTGTTTCAAAGCTTCTCTCT
				CCAATGGTAGAAAAGGAAAT		ATATCTCCACTTGCAGATTC
				ATTTCCTTTTCTACCATTGG		AACTCAGTCGTCACCAAGAG
				GCAGTTTGGAAACACTCAGT		AAACTGCTCCATCCAAAGGA
				ACTGAGTGTTTCCAAACTGC		TCCACTTGCACATTCTACAA
				GTCAGCAACTGGATATTTGG		TTATCCCGTTTCCAACGAAA
				CCAAATATCCAGTTGCTGAC		ATGCTTCTGTTTAGTTCTGT
				ATTTGAGGCCTTCGTTGGAA		GAGCGGTCCAAATATCTACT
				TTCCAACGAAGGCCTCAAAT		TTATCCCGTTTCCAACGAAA
						ATGCTTCTGTTTAGTTCTGT
						CATCACGAAGAGGGTTCTGA
						GTTCAGCACTGTGAGTTGAA
						ATATCCACTTGCAGTTTCTA
						CGAAATGCTCAGAGAGGACC
						AGTGCTTCTGTTTAGTTCTG
						ACGGTACTCCTCAAAGAGTG
						GCTCTGTGAGTTCAACTCAA
