# Supplementary material for: Alpha-satellite RNA transcripts are repressed by centromere–nucleolus associations
Source: eLife journal article supplement (doi:10.7554/elife.59770), 2020-11-10
Supplement: supp [file elife-59770-supp-v1.zip › elife_poa_e59770_Supplementary_file_2.xlsx]

## Sheet: Sheet1
hg38_chr	chrS	chrE	span	GenBank	SF [1 or 3]	ASAT k-mer match	total kmers	freq	Antisense k-mer match	total kmers	freq	SF1 k-mer match	total kmers	freq	7.2 k-mer match	total kmers	freq	SF 3 k-mer match	total kmers	freq	X k-mer match	total kmers	freq
chr1	122503247	124785432	2282185	GJ212202.1	1	4121	2282166	0.00180574	8099	2282166	0.00354882	11763	2282166	0.00515431	1	2282166	4.38e-07	39	2282166	1.71e-05	0	2282166	0
chr1	122224635	122503147	278512	GJ211837.1	3	422	278255	0.00151659	287	278255	0.00103143	0	278255	0	0	278255	0	839	278255	0.00301522	0	278255	0
chr1	124849229	124932724	83495	GJ211857.1	3	95	83476	0.00113805	87	83476	0.00104222	1	83476	1.2e-05	0	83476	0	285	83476	0.00341415	0	83476	0
chr1	124785532	124849129	63597	GJ211855.1	3	27	63578	0.000424675	4	63578	6.29e-05	0	63578	0	0	63578	0	202	63578	0.0031772	1	63578	1.57e-05
chr1	122026459	122224535	198076	GJ211836.1	3	75	197462	0.00037982	9	197462	4.56e-05	0	197462	0	0	197462	0	386	197462	0.00195481	1	197462	5.06e-06
chr2	92188145	94090557	1902412	GJ211860.1		9732	1901322	0.00511854	13339	1901322	0.00701564	8	1901322	4.21e-06	0	1901322	0	2225	1901322	0.00117024	0	1901322	0
chr3	91233686	91247622	13936	GJ211867.1		37	13917	0.00265862	60	13917	0.00431127	0	13917	0	0	13917	0	5	13917	0.000359273	0	13917	0
chr3	91553419	93655574	2102155	GJ211871.1	1	4433	2101898	0.00210905	8086	2101898	0.003847	18407	2101898	0.00875732	0	2101898	0	2435	2101898	0.00115848	0	2101898	0
chr3	90772458	91233586	461128	GJ211866.1		639	461109	0.00138579	847	461109	0.00183688	1	461109	2.17e-06	0	461109	0	203	461109	0.000440243	0	461109	0
chr4	49712061	51743951	2031890	GJ211881.1		9476	2031514	0.0046645	8960	2031514	0.0044105	0	2031514	0	0	2031514	0	918	2031514	0.00045188	0	2031514	0
chr5	49667531	49721203	53672	GJ211904.2		393	53653	0.00732485	372	53653	0.00693344	26	53653	0.000484595	1	53653	1.86e-05	62	53653	0.00115557	0	53653	0
chr5	49721303	50059807	338504	GJ211906.2		1978	338485	0.00584369	2009	338485	0.00593527	115	338485	0.000339749	18	338485	5.32e-05	437	338485	0.00129105	0	338485	0
chr5	46569162	46796725	227563	GJ211883.1		1077	227425	0.00473563	796	227425	0.00350005	0	227425	0	2	227425	8.79e-06	572	227425	0.00251511	1	227425	4.4e-06
chr5	46796825	47061288	264463	GJ211884.1		1184	264325	0.00447933	1002	264325	0.00379079	0	264325	0	0	264325	0	680	264325	0.00257259	0	264325	0
chr5	47106994	47153339	46345	GJ211886.1		170	46326	0.00366965	145	46326	0.00312999	0	46326	0	0	46326	0	103	46326	0.00222337	0	46326	0
chr5	46485900	46569062	83162	GJ211882.1		289	82667	0.00349595	274	82667	0.0033145	1	82667	1.21e-05	17	82667	0.000205644	106	82667	0.00128225	3	82667	3.63e-05
chr5	47309184	49591369	2282185	GJ212203.1	1	4121	2282166	0.00180574	8099	2282166	0.00354882	11763	2282166	0.00515431	1	2282166	4.38e-07	39	2282166	1.71e-05	0	2282166	0
chr5	47153439	47296069	142630	GJ211887.1		191	142611	0.00133931	247	142611	0.00173198	463	142611	0.00324659	0	142611	0	97	142611	0.000680172	0	142611	0
chr6	58553888	59829934	1276046	GJ211907.1	1	3945	1275789	0.0030922	5499	1275789	0.00431027	3907	1275789	0.00306242	404	1275789	0.000316667	1026	1275789	0.000804208	0	1275789	0
chr7	61377788	61528020	150232	GJ212194.1		1194	150213	0.00794871	1314	150213	0.00874758	0	150213	0	488	150213	0.00324872	51	150213	0.000339518	0	150213	0
chr7	58169653	60828234	2658581	GJ211908.1	1	4864	2657967	0.00182997	7256	2657967	0.00272991	9919	2657967	0.0037318	0	2657967	0	2319	2657967	0.000872471	0	2657967	0
chr8	44033744	45877265	1843521	GJ211909.1		5227	1842907	0.00283628	5933	1842907	0.00321937	0	1842907	0	0	1842907	0	2036	1842907	0.00110478	0	1842907	0
chr9	43389635	45518558	2128923	GJ211929.1		15485	2128785	0.0072741	13843	2128785	0.00650277	1	2128785	4.7e-07	2	2128785	9.4e-07	1287	2128785	0.00060457	0	2128785	0
chr10	39686682	39935900	249218	GJ211930.1		618	249199	0.00247995	686	249199	0.00275282	1238	249199	0.00496792	0	249199	0	58	249199	0.000232746	0	249199	0
chr10	41497540	41545720	48180	GJ211933.1		105	48161	0.00218019	113	48161	0.0023463	117	48161	0.00242935	0	48161	0	21	48161	0.000436037	0	48161	0
chr10	39936000	41497440	1561440	GJ211932.1	1	3062	1560945	0.00196163	3872	1560945	0.00248055	7076	1560945	0.00453315	0	1560945	0	704	1560945	0.000451009	0	1560945	0
chr10	41545820	41593521	47701	GJ211936.1		35	47682	0.00073403	35	47682	0.00073403	102	47682	0.00213917	0	47682	0	0	47682	0	0	47682	0
chr11	51078348	51090317	11969	GJ211938.1		147	11950	0.0123013	151	11950	0.012636	0	11950	0	0	11950	0	4	11950	0.000334728	0	11950	0
chr11	51090417	54342399	3251982	GJ211943.1	3	16973	3251011	0.00522084	17075	3251011	0.00525221	0	3251011	0	7	3251011	2.15e-06	8116	3251011	0.00249645	90	3251011	2.77e-05
chr11	54342499	54425074	82575	GJ211948.1		204	82556	0.00247105	209	82556	0.00253161	0	82556	0	0	82556	0	41	82556	0.000496633	0	82556	0
chr12	34835295	37185252	2349957	GJ211954.1	1	5082	2349343	0.00216316	7604	2349343	0.00323665	12461	2349343	0.00530404	0	2349343	0	2499	2349343	0.0010637	0	2349343	0
chr12	34769407	34816611	47204	GJ211949.1		59	47066	0.00125356	83	47066	0.00176348	131	47066	0.00278333	0	47066	0	20	47066	0.000424935	0	47066	0
chr13	16228627	16249297	20670	GJ211965.2		170	20651	0.00823205	186	20651	0.00900683	6	20651	0.000290543	5	20651	0.000242119	9	20651	0.000435814	0	20651	0
chr13	16249397	16256067	6670	GJ211967.2		48	6651	0.00721696	56	6651	0.00841979	0	6651	0	0	6651	0	6	6651	0.00090212	0	6651	0
chr13	17417364	17418562	1198	GJ211986.2		8	1179	0.00678541	8	1179	0.00678541	0	1179	0	0	1179	0	0	1179	0	0	1179	0
chr13	16256167	16259412	3245	GJ211968.2		18	3226	0.00557967	21	3226	0.00650961	0	3226	0	0	3226	0	0	3226	0	0	3226	0
chr13	16282173	17416384	1134211	GJ211972.2		6164	1134192	0.00543471	6183	1134192	0.00545146	2	1134192	1.76e-06	5	1134192	4.41e-06	1386	1134192	0.00122202	5	1134192	4.41e-06
chr13	16259512	16282073	22561	GJ211969.2		87	22542	0.00385946	97	22542	0.00430308	1	22542	4.44e-05	5	22542	0.000221808	1	22542	4.44e-05	0	22542	0
chr13	17416484	17416824	340	GJ212205.1		1	321	0.00311526	2	321	0.00623053	3	321	0.00934579	0	321	0	0	321	0	0	321	0
chr13	16000000	16022537	22537	GJ211955.2		51	22518	0.00226485	55	22518	0.00244249	1	22518	4.44e-05	0	22518	0	7	22518	0.000310862	0	22518	0
chr13	17418662	18051248	632586	GJ211991.2		1382	632567	0.00218475	1955	632567	0.00309058	0	632567	0	4	632567	6.32e-06	315	632567	0.000497971	0	632567	0
chr13	16022637	16110659	88022	GJ211961.2		163	88003	0.00185221	178	88003	0.00202266	0	88003	0	0	88003	0	5	88003	5.68e-05	0	88003	0
chr13	16164992	16228527	63535	GJ211963.2		65	63516	0.00102336	91	63516	0.00143271	0	63516	0	0	63516	0	0	63516	0	0	63516	0
chr13	16110759	16164892	54133	GJ211962.2		15	54114	0.000277193	47	54114	0.000868537	0	54114	0	0	54114	0	0	54114	0	0	54114	0
chr13	17416924	17417264	340	GJ212206.1		0	321	0	1	321	0.00311526	1	321	0.00311526	0	321	0	0	321	0	0	321	0
chr14	16346617	16367287	20670	GJ212002.2		170	20651	0.00823205	186	20651	0.00900683	6	20651	0.000290543	5	20651	0.000242119	9	20651	0.000435814	0	20651	0
chr14	16367387	16374057	6670	GJ212004.2		48	6651	0.00721696	56	6651	0.00841979	0	6651	0	0	6651	0	6	6651	0.00090212	0	6651	0
chr14	17539639	17540837	1198	GJ212023.2		8	1179	0.00678541	8	1179	0.00678541	0	1179	0	0	1179	0	0	1179	0	0	1179	0
chr14	16374157	16377402	3245	GJ212005.2		18	3226	0.00557967	21	3226	0.00650961	0	3226	0	0	3226	0	0	3226	0	0	3226	0
chr14	16404448	17538659	1134211	GJ212009.2		6164	1134192	0.00543471	6183	1134192	0.00545146	2	1134192	1.76e-06	5	1134192	4.41e-06	1386	1134192	0.00122202	5	1134192	4.41e-06
chr14	16377502	16400063	22561	GJ212006.2		87	22542	0.00385946	97	22542	0.00430308	1	22542	4.44e-05	5	22542	0.000221808	1	22542	4.44e-05	0	22542	0
chr14	17538759	17539099	340	GJ212210.1		1	321	0.00311526	2	321	0.00623053	3	321	0.00934579	0	321	0	0	321	0	0	321	0
chr14	16000000	16022537	22537	GJ211992.2		51	22518	0.00226485	55	22518	0.00244249	1	22518	4.44e-05	0	22518	0	7	22518	0.000310862	0	22518	0
chr14	17540937	18173523	632586	GJ212028.2		1382	632567	0.00218475	1955	632567	0.00309058	0	632567	0	4	632567	6.32e-06	315	632567	0.000497971	0	632567	0
chr14	16140627	16228649	88022	GJ211998.2		163	88003	0.00185221	178	88003	0.00202266	0	88003	0	0	88003	0	5	88003	5.68e-05	0	88003	0
chr14	16282982	16346517	63535	GJ212000.2		65	63516	0.00102336	91	63516	0.00143271	0	63516	0	0	63516	0	0	63516	0	0	63516	0
chr14	16228749	16282882	54133	GJ211999.2		15	54114	0.000277193	47	54114	0.000868537	0	54114	0	0	54114	0	0	54114	0	0	54114	0
chr14	17539199	17539539	340	GJ212211.1		0	321	0	1	321	0.00311526	1	321	0.00311526	0	321	0	0	321	0	0	321	0
chr15	18355108	19725254	1370146	GJ212045.1		6594	1370008	0.00481311	6044	1370008	0.00441165	2	1370008	1.46e-06	0	1370008	0	534	1370008	0.000389779	0	1370008	0
chr15	17083673	17498951	415278	GJ212036.1		1044	415259	0.00251409	1039	415259	0.00250205	0	415259	0	0	415259	0	507	415259	0.00122092	0	415259	0
chr15	17499051	18355008	855957	GJ212042.1		1495	855700	0.00174711	1758	855700	0.00205446	0	855700	0	210	855700	0.000245413	475	855700	0.000555101	0	855700	0
chr16	36311158	36334460	23302	GJ212046.1		56	23164	0.00241754	63	23164	0.00271974	0	23164	0	0	23164	0	0	23164	0	0	23164	0
chr16	36337666	38265669	1928003	GJ212051.1	1	4275	1927508	0.00221789	6205	1927508	0.00321918	14575	1927508	0.00756158	0	1927508	0	10	1927508	5.19e-06	0	1927508	0
chr17	26566733	26616164	49431	GJ212055.1	3	200	49174	0.00406719	199	49174	0.00404685	1	49174	2.03e-05	1	49174	2.03e-05	256	49174	0.005206	0	49174	0
chr17	22813679	23194918	381239	GJ212053.1	3	929	381220	0.00243691	934	381220	0.00245003	0	381220	0	0	381220	0	1945	381220	0.00510204	0	381220	0
chr17	23195018	26566633	3371615	GJ212054.1	3	5532	3371239	0.00164094	5499	3371239	0.00163115	1	3371239	2.97e-07	1	3371239	2.97e-07	41239	3371239	0.0122326	1292	3371239	0.000383242
chr18	20696389	20736025	39636	GJ212067.1		204	39617	0.0051493	187	39617	0.0047202	0	39617	0	0	39617	0	19	39617	0.000479592	0	39617	0
chr18	15797855	20561439	4763584	GJ212062.1		23398	4762395	0.00491307	19208	4762395	0.00403326	17	4762395	3.57e-06	0	4762395	0	6842	4762395	0.00143667	0	4762395	0
chr18	20736125	20813083	76958	GJ212069.1		286	76701	0.00372876	256	76701	0.00333764	0	76701	0	0	76701	0	17	76701	0.00022164	0	76701	0
chr18	20839797	20861206	21409	GJ212071.1		58	21271	0.00272672	47	21271	0.00220958	0	21271	0	0	21271	0	1	21271	4.7e-05	0	21271	0
chr18	20603247	20696289	93042	GJ212066.1		242	92547	0.00261489	215	92547	0.00232314	0	92547	0	4	92547	4.32e-05	20	92547	0.000216106	0	92547	0
chr18	15460899	15780377	319478	GJ212060.1		684	319340	0.00214192	701	319340	0.00219515	0	319340	0	0	319340	0	16	319340	5.01e-05	0	319340	0
chr19	24498980	24552652	53672	GJ212072.2		393	53653	0.00732485	372	53653	0.00693344	26	53653	0.000484595	1	53653	1.86e-05	62	53653	0.00115557	0	53653	0
chr19	24552752	24891256	338504	GJ212077.2		1978	338485	0.00584369	2009	338485	0.00593527	115	338485	0.000339749	18	338485	5.32e-05	437	338485	0.00129105	0	338485	0
chr19	24908689	27190874	2282185	GJ212201.1	1	4121	2282166	0.00180574	8099	2282166	0.00354882	11763	2282166	0.00515431	1	2282166	4.38e-07	39	2282166	1.71e-05	0	2282166	0
chr20	29917404	30038348	120944	GJ212117.1		1234	120568	0.0102349	1403	120568	0.0116366	1	120568	8.29e-06	0	120568	0	251	120568	0.00208181	0	120568	0
chr20	28508997	28556953	47956	GJ212095.1		348	47937	0.00725953	408	47937	0.00851117	0	47937	0	20	47937	0.000417214	41	47937	0.000855289	1	47937	2.09e-05
chr20	26436232	26586955	150723	GJ212091.1		1086	150585	0.00721187	960	150585	0.00637514	18	150585	0.000119534	0	150585	0	105	150585	0.000697281	0	150585	0
chr20	26608145	28494539	1886394	GJ212093.1		12291	1885185	0.00651978	10925	1885185	0.00579519	0	1885185	0	0	1885185	0	2014	1885185	0.00106833	0	1885185	0
chr20	29125793	29204668	78875	GJ212107.1		345	78499	0.00439496	364	78499	0.004637	0	78499	0	0	78499	0	8	78499	0.000101912	0	78499	0
chr20	28648108	28728874	80766	GJ212105.1		266	79795	0.00333354	266	79795	0.00333354	0	79795	0	0	79795	0	41	79795	0.000513817	0	79795	0
chr21	11093187	11113857	20670	GJ212128.2		170	20651	0.00823205	186	20651	0.00900683	6	20651	0.000290543	5	20651	0.000242119	9	20651	0.000435814	0	20651	0
chr21	11113957	11120627	6670	GJ212130.2		48	6651	0.00721696	56	6651	0.00841979	0	6651	0	0	6651	0	6	6651	0.00090212	0	6651	0
chr21	12281924	12283122	1198	GJ212149.2		8	1179	0.00678541	8	1179	0.00678541	0	1179	0	0	1179	0	0	1179	0	0	1179	0
chr21	11120727	11123972	3245	GJ212131.2		18	3226	0.00557967	21	3226	0.00650961	0	3226	0	0	3226	0	0	3226	0	0	3226	0
chr21	11146733	12280944	1134211	GJ212135.2		6164	1134192	0.00543471	6183	1134192	0.00545146	2	1134192	1.76e-06	5	1134192	4.41e-06	1386	1134192	0.00122202	5	1134192	4.41e-06
chr21	11124072	11146633	22561	GJ212132.2		87	22542	0.00385946	97	22542	0.00430308	1	22542	4.44e-05	5	22542	0.000221808	1	22542	4.44e-05	0	22542	0
chr21	12281044	12281384	340	GJ212204.1		1	321	0.00311526	2	321	0.00623053	3	321	0.00934579	0	321	0	0	321	0	0	321	0
chr21	10864560	10887097	22537	GJ212118.2		51	22518	0.00226485	55	22518	0.00244249	1	22518	4.44e-05	0	22518	0	7	22518	0.000310862	0	22518	0
chr21	12283222	12915808	632586	GJ212154.2		1382	632567	0.00218475	1955	632567	0.00309058	0	632567	0	4	632567	6.32e-06	315	632567	0.000497971	0	632567	0
chr21	10887197	10975219	88022	GJ212124.2		163	88003	0.00185221	178	88003	0.00202266	0	88003	0	0	88003	0	5	88003	5.68e-05	0	88003	0
chr21	11029552	11093087	63535	GJ212126.2		65	63516	0.00102336	91	63516	0.00143271	0	63516	0	0	63516	0	0	63516	0	0	63516	0
chr21	10975319	11029452	54133	GJ212125.2		15	54114	0.000277193	47	54114	0.000868537	0	54114	0	0	54114	0	0	54114	0	0	54114	0
chr21	12281484	12281824	340	GJ212207.1		0	321	0	1	321	0.00311526	1	321	0.00311526	0	321	0	0	321	0	0	321	0
chr22	13227412	13248082	20670	GJ212165.2		170	20651	0.00823205	186	20651	0.00900683	6	20651	0.000290543	5	20651	0.000242119	9	20651	0.000435814	0	20651	0
chr22	13248182	13254852	6670	GJ212167.2		48	6651	0.00721696	56	6651	0.00841979	0	6651	0	0	6651	0	6	6651	0.00090212	0	6651	0
chr22	14420434	14421632	1198	GJ212186.2		8	1179	0.00678541	8	1179	0.00678541	0	1179	0	0	1179	0	0	1179	0	0	1179	0
chr22	13254952	13258197	3245	GJ212168.2		18	3226	0.00557967	21	3226	0.00650961	0	3226	0	0	3226	0	0	3226	0	0	3226	0
chr22	13285243	14419454	1134211	GJ212172.2		6164	1134192	0.00543471	6183	1134192	0.00545146	2	1134192	1.76e-06	5	1134192	4.41e-06	1386	1134192	0.00122202	5	1134192	4.41e-06
chr22	13258297	13280858	22561	GJ212169.2		87	22542	0.00385946	97	22542	0.00430308	1	22542	4.44e-05	5	22542	0.000221808	1	22542	4.44e-05	0	22542	0
chr22	14419554	14419894	340	GJ212208.1		1	321	0.00311526	2	321	0.00623053	3	321	0.00934579	0	321	0	0	321	0	0	321	0
chr22	12954788	12977325	22537	GJ212155.2		51	22518	0.00226485	55	22518	0.00244249	1	22518	4.44e-05	0	22518	0	7	22518	0.000310862	0	22518	0
chr22	14421732	15054318	632586	GJ212191.2		1382	632567	0.00218475	1955	632567	0.00309058	0	632567	0	4	632567	6.32e-06	315	632567	0.000497971	0	632567	0
chr22	13021422	13109444	88022	GJ212161.2		163	88003	0.00185221	178	88003	0.00202266	0	88003	0	0	88003	0	5	88003	5.68e-05	0	88003	0
chr22	13163777	13227312	63535	GJ212163.2		65	63516	0.00102336	91	63516	0.00143271	0	63516	0	0	63516	0	0	63516	0	0	63516	0
chr22	13109544	13163677	54133	GJ212162.2		15	54114	0.000277193	47	54114	0.000868537	0	54114	0	0	54114	0	0	54114	0	0	54114	0
chr22	14419994	14420334	340	GJ212209.1		0	321	0	1	321	0.00311526	1	321	0.00311526	0	321	0	0	321	0	0	321	0
chrX	58605579	62412542	3806963	GJ212192.1	3	11400	3805516	0.00299565	11270	3805516	0.00296149	0	3805516	0	795	3805516	0.000208907	12536	3805516	0.00329417	14347	3805516	0.00377005
chrY	10316944	10544039	227095	GJ212193.1		764	227076	0.00336451	722	227076	0.00317955	0	227076	0	0	227076	0	0	227076	0	0	227076	0
Total Counts												104075	59529741		2068	59529741		102146	59529741		15756	59529741
On-Target (where relevant)												101634			488			65804			14347
On-Target %											SF1	97.6546		D7Z2	23.5977		SF3	64.4215		DXZ1	91.0574
