# Supplementary figures and images for: Alpha-satellite RNA transcripts are repressed by centromere–nucleolus associations
Source: eLife journal article supplement (doi:10.7554/elife.59770), 2020-11-10

Figure 4 - figure supplement 1

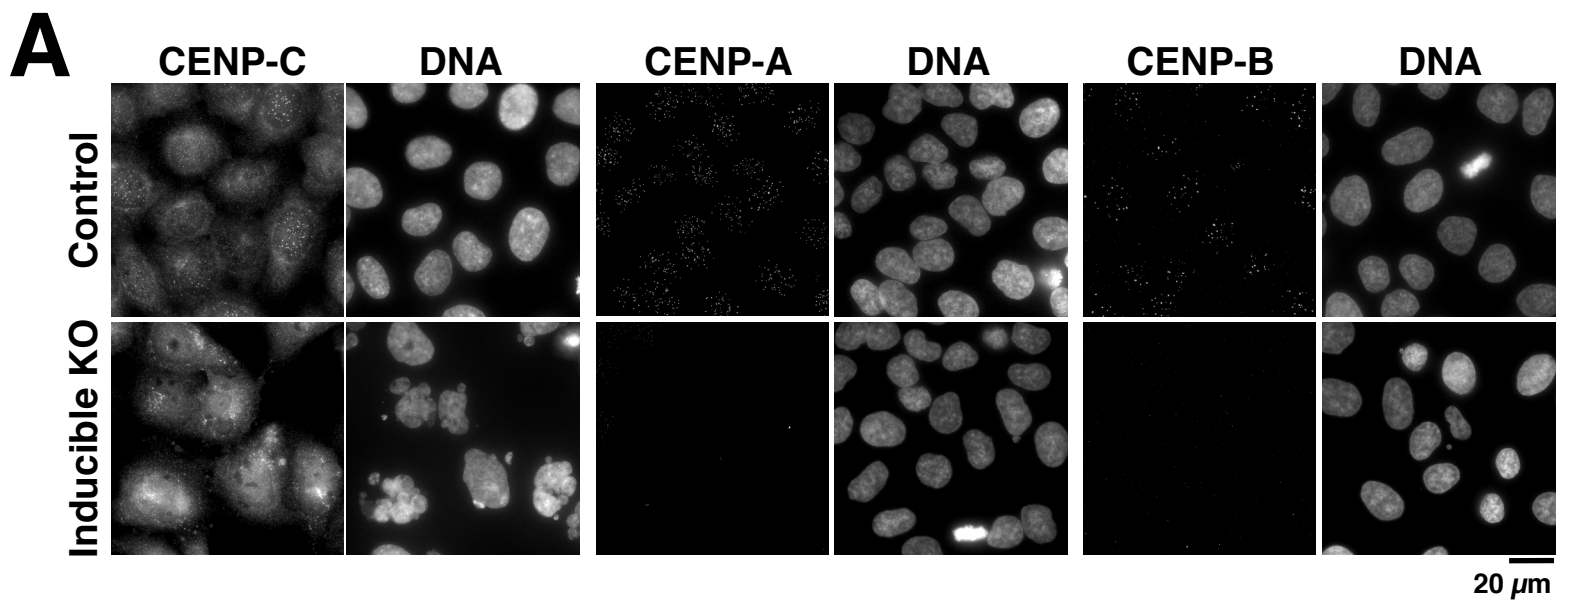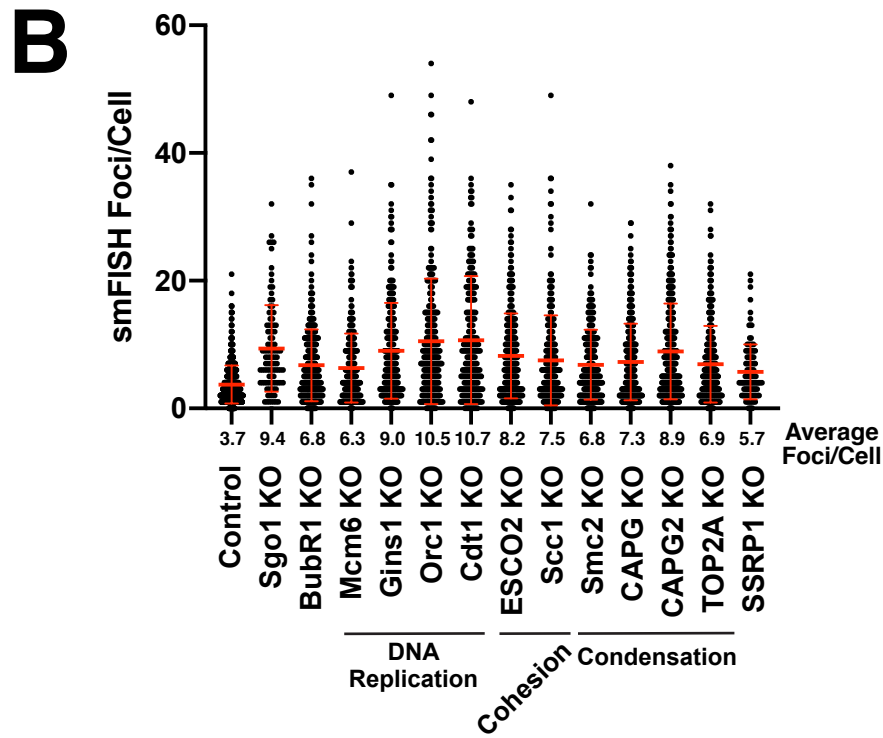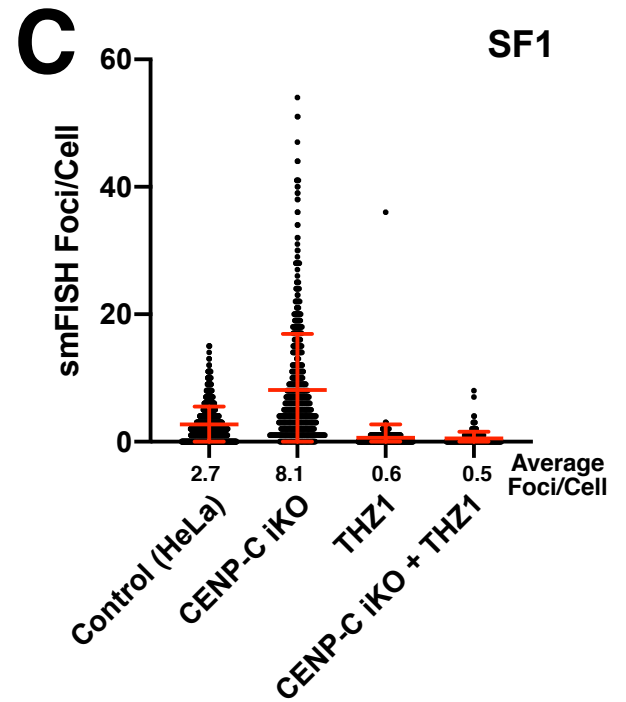

Supplement: supp [file elife-59770-supp-v1.zip]

Figure 3 - figure supplement 1

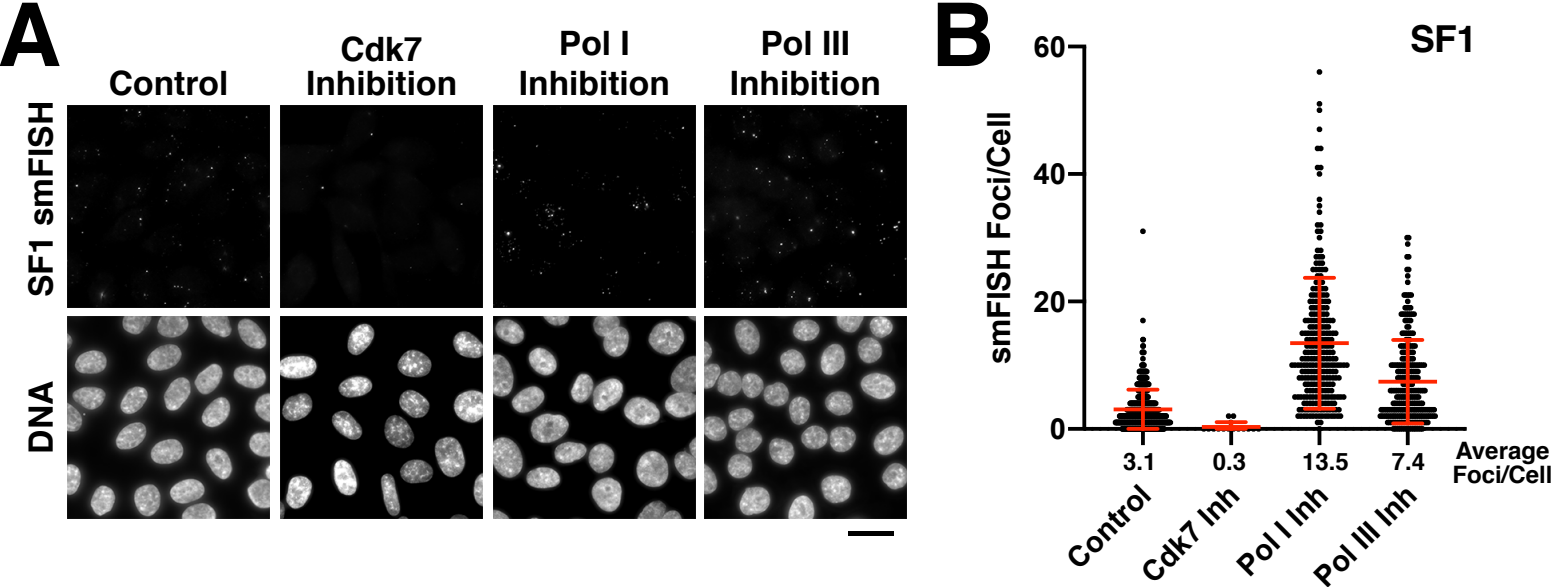

Supplement: supp [file elife-59770-supp-v1.zip]

Figure 1 - figure supplement 1

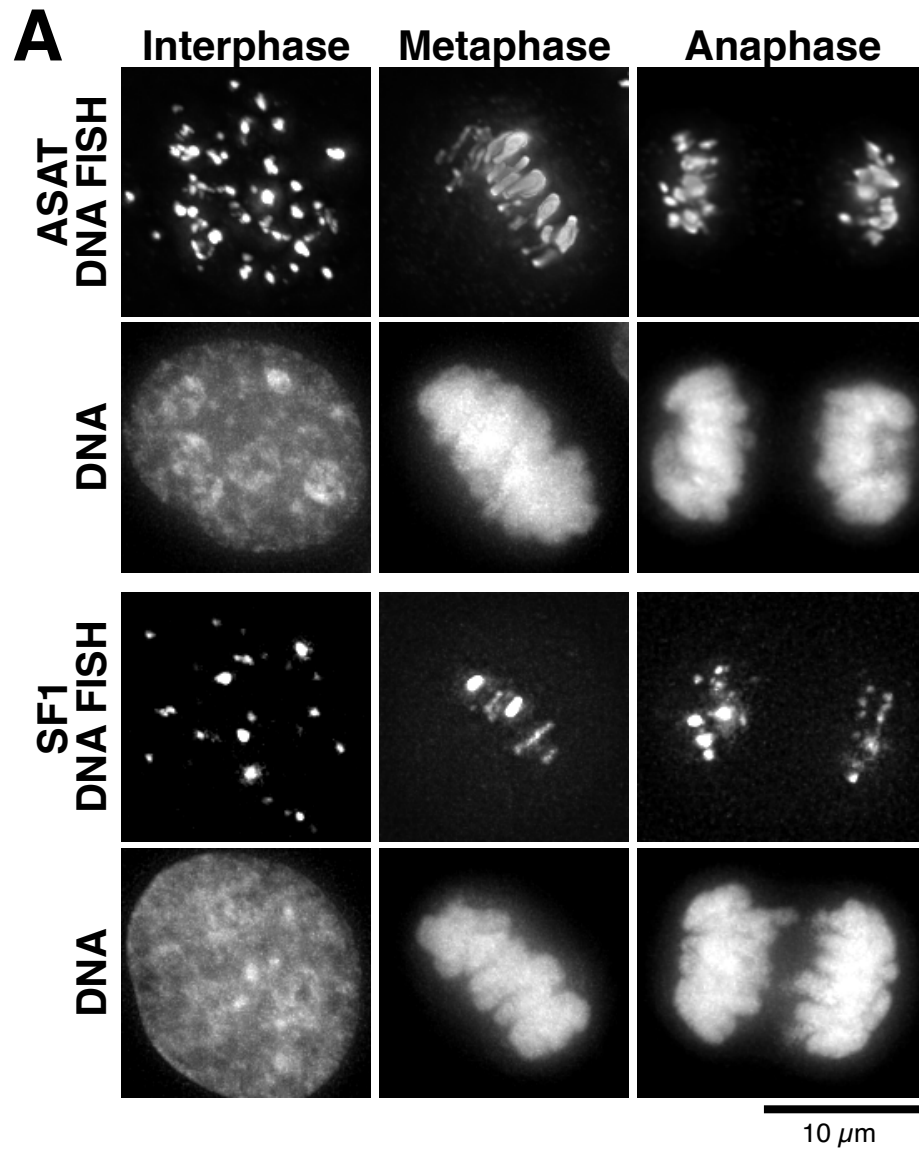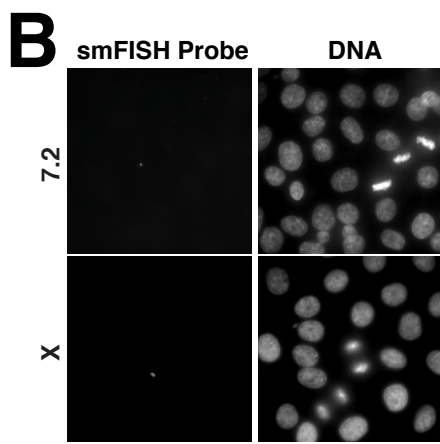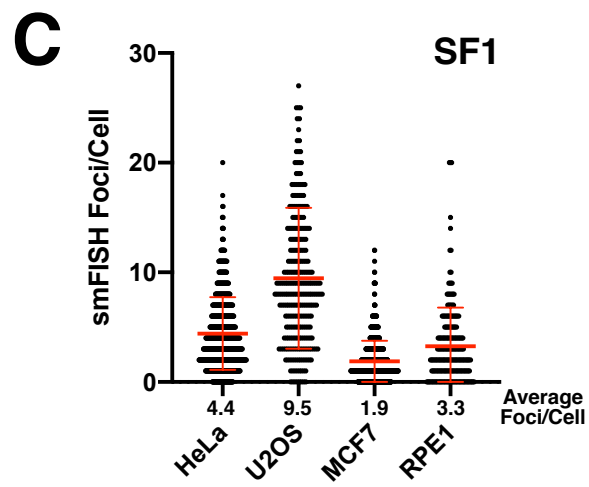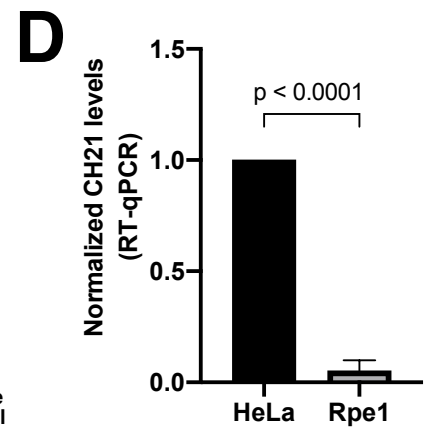

Supplement: supp [file elife-59770-supp-v1.zip › elife_poa_e59770_Figure_1_figure_supplement_1.pdf]

Figure 5 - figure supplement 1

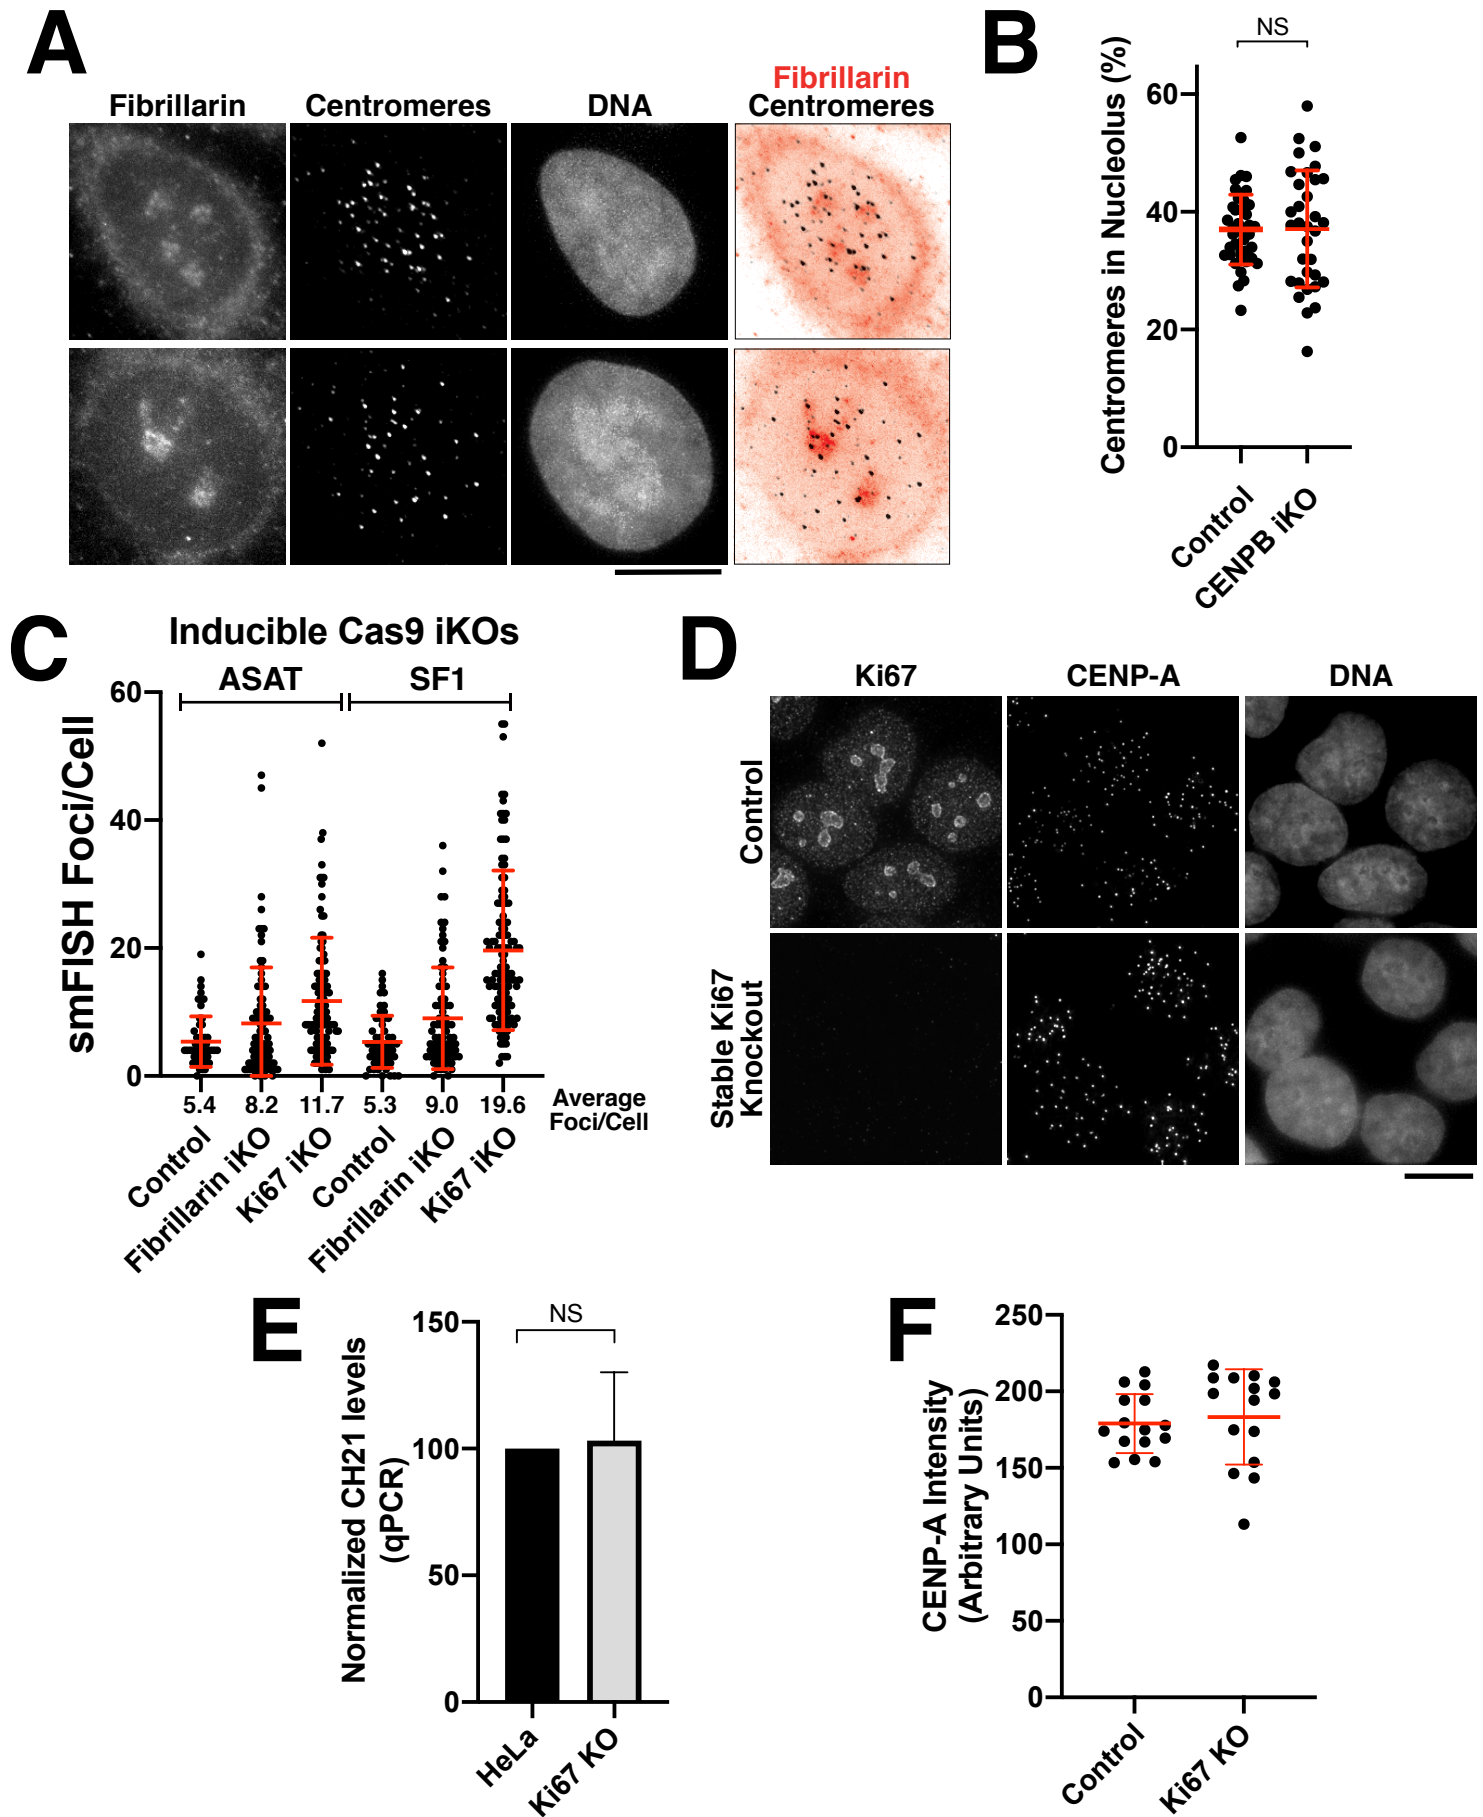

Supplement: supp [file elife-59770-supp-v1.zip › elife_poa_e59770_Figure_5_figure_supplement_1.pdf]
